# Supplementary material for: Disordered Expression of shaggy, the Drosophila Gene Encoding a Serine-Threonine Protein Kinase GSK3, Affects the Lifespan in a Transcript-, Stage-, and Tissue-Specific Manner
Source: Int J Mol Sci. 2019 May 4;20(9):2200. doi: 10.3390/ijms20092200 (PMC6540023; doi:10.3390/ijms20092200)
Supplement: Supplementary file 1 [file ijms-20-02200-s001.zip]

Archive with 6 entries (6 files):
- Supplementary Material/Supplementary Figures 1, 2, 3.pdf
- Supplementary Material/Table S1.docx
- Supplementary Material/Table S2.docx
- Supplementary Material/Table S3.docx
- Supplementary Material/Table S4.docx
- Supplementary Material/Table S5.docx
